# Supplementary material for: Versatile functionalization of surface-tailorable polymer nanohydrogels for drug delivery systems
Source: Royal Society of Chemistry journal article supplement (doi:10.1039/c8bm01093e), 2018-11-22
Supplement: c8bm01093e1.pdf [file c8bm01093e1.pdf]

## Supporting Information

### ***Versatile functionalization of surface-tailorable polymer nanohydrogels for drug delivery systems***

*Wen Jing Yang, Lijun Liang, Xiaodong Wang, Yanpeng Cao, Wenya Xu, Dongqing Chang, Yu Gao, Lianhui Wang\**

Key Laboratory for Organic Electronics and Information Displays (KLOEID), Jiangsu Key Laboratory for Biosensor, Institute of Advanced Materials (IAM), Jiangsu National Synergistic Innovation Center for Advanced Materials (SICAM), Nanjing University of Posts & Telecommunications, 9 Wenyuan Road, Nanjing, 210023, China

**Table S1 The characterization of poly(AA-*co*-DMA) nanohydrogels with different monomer ratios**

| Sample   | Molar ratio (AA:DMA) | Monomers (mmol) | AIBN (wt) | BMOD (mmol) | D <sub>TEM</sub> (nm) | Homogeneity     |
|----------|----------------------|-----------------|-----------|-------------|-----------------------|-----------------|
| a        | 8:2                  | 3               | 2%        | 3%          | 183±28                | Good            |
| <b>b</b> | <b>7:3</b>           | <b>3</b>        | <b>2%</b> | <b>3%</b>   | <b>205±12</b>         | <b>Superior</b> |
| c        | 6:4                  | 3               | 2%        | 3%          | 335±23                | Good            |
| d        | 4:6                  | 3               | 2%        | 3%          | 401±19                | Good            |

**Table S2 Drug loading efficiencies and drug loading capacities of DOX and BTZ in poly(AA-*co*-DMA) nanohydrogels**

| Mass ratio (NG:DOX:BTZ) | DLE (DOX, %) | DLC (DOX, wt %) | DLE (BTZ, %) | DLC (BTZ, wt %) |
|-------------------------|--------------|-----------------|--------------|-----------------|
| 1: 1: 0.5               | 96.6         | 96.6            | 10.1         | 5.0             |
| 1: 1: 1                 | 96.1         | 96.2            | 9.9          | 9.9             |
| <b>1: 1: 2</b>          | <b>93.7</b>  | <b>93.7</b>     | <b>13.1</b>  | <b>26.2</b>     |
| 1: 1: 3                 | 99.5         | 89.5            | 3.5          | 7.1             |

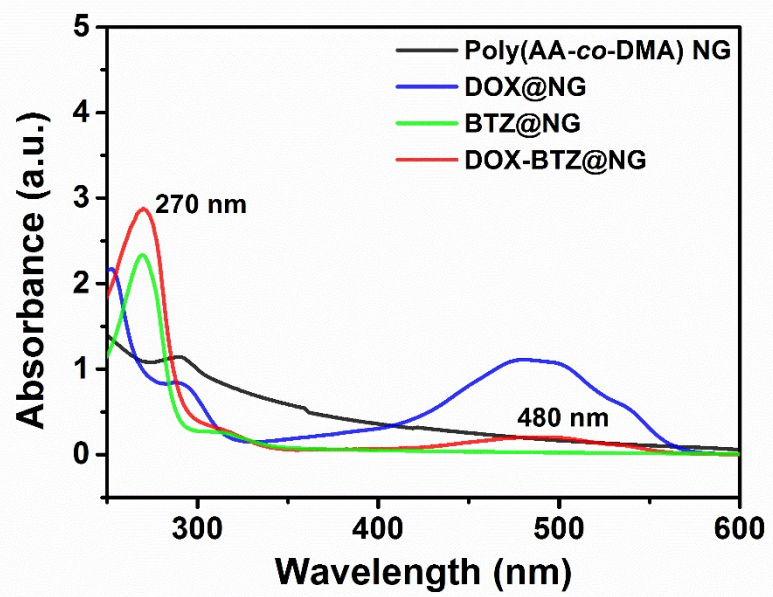

Figure S1 The UV-vis spectra of poly(AA-co-DMA) NG, DOX@NG, BTZ@NG, and DOX-BTZ@NG.

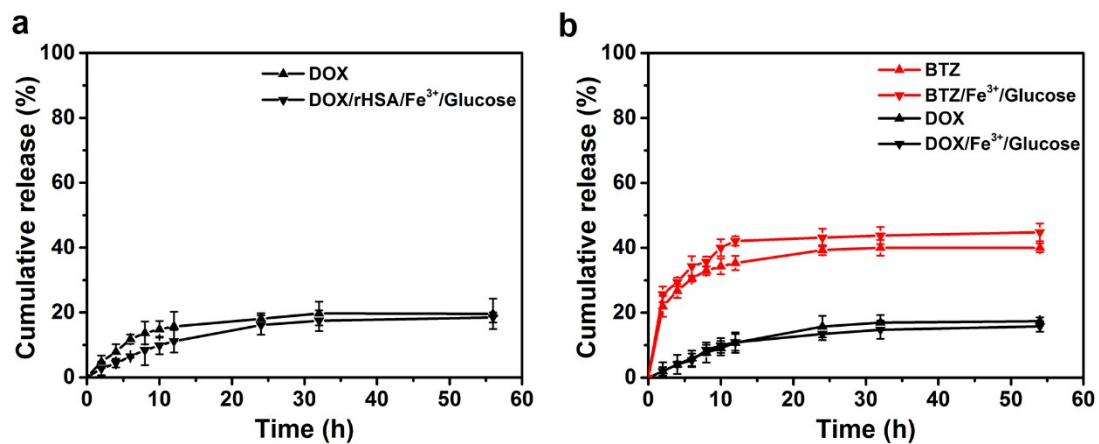

Figure S2 (a) DOX release profiles of DOX-Fe<sub>3</sub>O<sub>4</sub>@NP in PBS at pH 7.4 and PBS containing rHSA (30 µg/mL), FeCl<sub>3</sub> (1.43 µg/mL) and glucose (10 mM) at pH 7.4. (b) BTZ and DOX release profiles of DOX-BTZ@NG in PBS at pH 7.4 and PBS containing FeCl<sub>3</sub> (1.43 µg/mL) and glucose (10 mM) at pH 7.4.

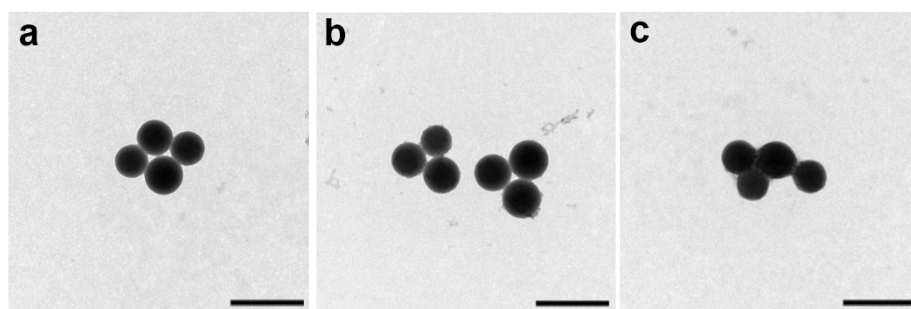

Figure S3 Biodegradation behaviors of the nanohydrogels observed by TEM. (a) Original poly(AA-*co*-DMA) NG. Degraded poly(AA-*co*-DMA) NG in PBS containing rHSA (30  $\mu\text{g}/\text{mL}$ ),  $\text{FeCl}_3$  (1.43  $\mu\text{g}/\text{mL}$ ) and glucose (10 mM) at pH 7.4 for (b) 12 h and (c) 24 h. (Scale bar: 500 nm).
